# Supplementary material for: Characterization of a Common S Haplotype BnS-6 in the Self-Incompatibility of Brassica napus
Source: Plants (Basel). 2021 Oct 15;10(10):2186. doi: 10.3390/plants10102186 (PMC8537745; doi:10.3390/plants10102186)
Supplement: Supplementary file 1 [file plants-10-02186-s001.zip]

Archive with 4 entries (4 files):
- Supportment Figure.pdf
- Supportment Table1.pdf
- Supportment Table2 .xlsx
- Supportment Table3 .xlsx
