# Supplementary material for: Characterization of a Common S Haplotype BnS-6 in the Self-Incompatibility of Brassica napus
Source: Plants (Basel). 2021 Oct 15;10(10):2186. doi: 10.3390/plants10102186 (PMC8537745; doi:10.3390/plants10102186)
Supplement: Supplementary file 1 [file plants-10-02186-s001.zip › Supportment Figure.pdf]

|                  |                                                                          |     |
|------------------|--------------------------------------------------------------------------|-----|
| <i>BnSCR1300</i> | .....GTTGGATTGAAGAT...GGCCTAAGTGTTTTTTAA.....ACCAGA                      | 38  |
| <i>BnSCR6</i>    | ....TTTTAGTGTGGATTGGAGAT...AGCCTAAGTGTATTTCAA.....AGGAGA                 | 45  |
| <i>BnSCR7</i>    | TTTGTATATATGTAAGGTTACCAATCAAGGTCTAAGTGTATTTTGAGTGATGACACGAGA             | 60  |
| Consensus        | gt g tt at g ctaagtgt ttt a a aga                                        |     |
| <i>BnSCR1300</i> | AGAGCTCCGCAGGAAAAGAAGAATTGGATGAGGAAGTTACACACACGAATAAGGTGTGAC             | 98  |
| <i>BnSCR6</i>    | AGAGCTCCGCAGGAAAAGAAGAATTAGGATGAGGAAGGTACACACACGAATAAGGTGTGAC            | 105 |
| <i>BnSCR7</i>    | GGAGCTATGCAGAAAAAGAAGACAGGGTGAGGAA.....ACACACGAATAAGGTGTGTC              | 115 |
| Consensus        | gagct gcag aaaagaagaa gg tgaggaa acacacgaataaggtgtg c                    |     |
| <i>BnSCR1300</i> | CCGAATTGTTTACGTGTAAAAATAGGCAATTAAAGTCAAGATGTGAAGGAAAAAATATA              | 158 |
| <i>BnSCR6</i>    | CCGAATTGTTTACGTGTAAAAATAGGCAATTATGTGCTAGATGCGAAGAAAA.....CA              | 159 |
| <i>BnSCR7</i>    | ....AATGTTTACGTGTGAAATAGGCAATTAAAGTCAAGATCTGTGAAGAAAAAATATA              | 171 |
| Consensus        | a tgtttaogtgt aaataggcaatta gtgc agat g aaa a                            |     |
| <i>BnSCR1300</i> | TATATATAGTAATACAAGCAATAACATTCTATAAAAAAGCGAAAATCTTATATACTCATA             | 218 |
| <i>BnSCR6</i>    | TATATATAGTAATACAAACAATAACATTCTATAAAAAAGCGAAAATCTTATATACTCATA             | 219 |
| <i>BnSCR7</i>    | TATATATC.TAGAGTAAACAATAACATTCTACAGAAA.GCGACGATCTTATATATTGAGA             | 229 |
| Consensus        | tatatat ta aa caataacattcta a aaa goga atcttatata tca a                  |     |
| <i>BnSCR1300</i> | AGTCATGAGATATGCTA <u>CTTCTATATATACATTTTAAACAATATACACTACTT</u> GTGTTT     | 278 |
| <i>BnSCR6</i>    | AGTCATGAGATATGCTACTTCTAT <u>CTATACATTTTAAACAATATACACTACTT</u> GTGTTT     | 279 |
| <i>BnSCR7</i>    | AGTCATGAGATATGCTACTTCTATATTTTTTTTTTAAACAAGATACACTACTTGTGTTT              | 289 |
| Consensus        | agtcattgagatatgctacttctatat t ttttaacaaa atacactactt tgttt               |     |
| <i>BnSCR1300</i> | CATATTTTTTGATTTTTGACATATGTTCAAG <u>GTAAGTATATCAATAACTTTCCCCCTTTTA</u>    | 338 |
| <i>BnSCR6</i>    | CATATTTTTTGATTTTTGACATATGTTCAAG <u>GTAAGTATATCAATAACTTTCCCCCTTTTA</u>    | 339 |
| <i>BnSCR7</i>    | CATATTTTTTGACTTTTGACATCTGTTCAAG <u>GTAAGTATATCAATAACTTTCCCCCTTTTA</u>    | 349 |
| Consensus        | catatTTTTga tttgacat tgttcaaggtaaactatatcaataacttt cccct tta             |     |
| <i>BnSCR1300</i> | <u>TGGACGCTTTAGGATTTTTCTTACCTAATTGCAATTCATAATTTTTTGTTAATTTAAAGC</u>      | 398 |
| <i>BnSCR6</i>    | <u>TGGACGATTTAGGATTTTTCTTACCTAATTGCAATTCATA.TTTTTTGTTAATTTAAAGC</u>      | 398 |
| <i>BnSCR7</i>    | <u>TTGACGATTTAGGATTTTTCTTACCCAATTGCAATTCATAATTTTT..TTTATTTAAAGC</u>      | 407 |
| Consensus        | t gacg ttttaggatttttcttacc aattgcaattcata ttttt tt atttaaagc             |     |
| <i>BnSCR1300</i> | ACTAGATGTGGGAGCTTGGAAATGCCCTGAAGGCATCGTCTATCCGAGTCTATCTCAGG              | 458 |
| <i>BnSCR6</i>    | ACTAGATGTGGGAGCTTGGAAATGCCCTGAAGGCATCGCTATCCGAGTCTATCTCAGG               | 458 |
| <i>BnSCR7</i>    | ACTAGATGTGGGAGCTAGGAAGTCC <u>CTGAAGGCATCGCTAATTT</u> AATGATGTCATAGG      | 467 |
| Consensus        | actagatgtgggagct ggaa tgcctgaaggcatcg c a cga t t tc agg                 |     |
| <i>BnSCR1300</i> | AAG <u>CTCAATTAATTCAGGACACACAGTGT</u> IAAAAAACACTATGAAGTTGAGGGACAGAA     | 518 |
| <i>BnSCR6</i>    | AAG <u>CTCAATTAATTCAGGACACACAGTGT</u> AGTGTAAAAAACACTATGAAGTTGAGGGACATAA | 518 |
| <i>BnSCR7</i>    | AACATGCTTAAATACCAAGAGCAGAGACTGTCAAAAAACACTTCG.....GACCGAA                | 518 |
| Consensus        | aa tgc t aat cca gagca aga tgt aaaaacact g gac aa                        |     |
| <i>BnSCR1300</i> | TGTTACTAATTGCCGTGTGTGATACCTATAGCATGCAAAATCCTGCGAGGATTACTTGCTA            | 578 |
| <i>BnSCR6</i>    | TGTTACTAATTGCCGTGTGTGATACCTATAGCATGCAAAATCCTGCGAGGATTACTTGCTA            | 578 |
| <i>BnSCR7</i>    | <u>TGTTACTAATTGCCCTTTGTATCCTTTTAGCACGCATAATCGTGTGAGGATTACTTGCTA</u>      | 578 |
| Consensus        | tgttactaattgcc ttgt at ctt tagca gca aatc tg gaggattacttgcta             |     |
| <i>BnSCR1300</i> | CTGTTGCAAAGTTAAATCA <u>TAATTGATCAACGAAACATCCAGAGACGGTTAC</u>             | 630 |
| <i>BnSCR6</i>    | CTGTTGCAAAGTTAAATCA <u>TAATTGATCAACGAAACATCCAGAGACGGTCAC</u>             | 630 |
| <i>BnSCR7</i>    | CTGTTGCAAAGTTAAATCA <u>TAATTGATCAACGAAACATCCAGAT</u> ACGATTAC            | 630 |
| Consensus        | ctgttgcaaagttaaatcataattgatcaacgaaacatccaga acg t ac                     |     |

**Figure S1.** Collinear comparison of SCR genomic sequences of *BnS-1300*, *BnS-6* and *BnS-7*. The SCAR marker primers were underlined with black. The qPCR primers were highlighted in green, and the blue box indicated the mutant position. The red box represented the initiation codon and termination codon, and the gray box represented the intron.

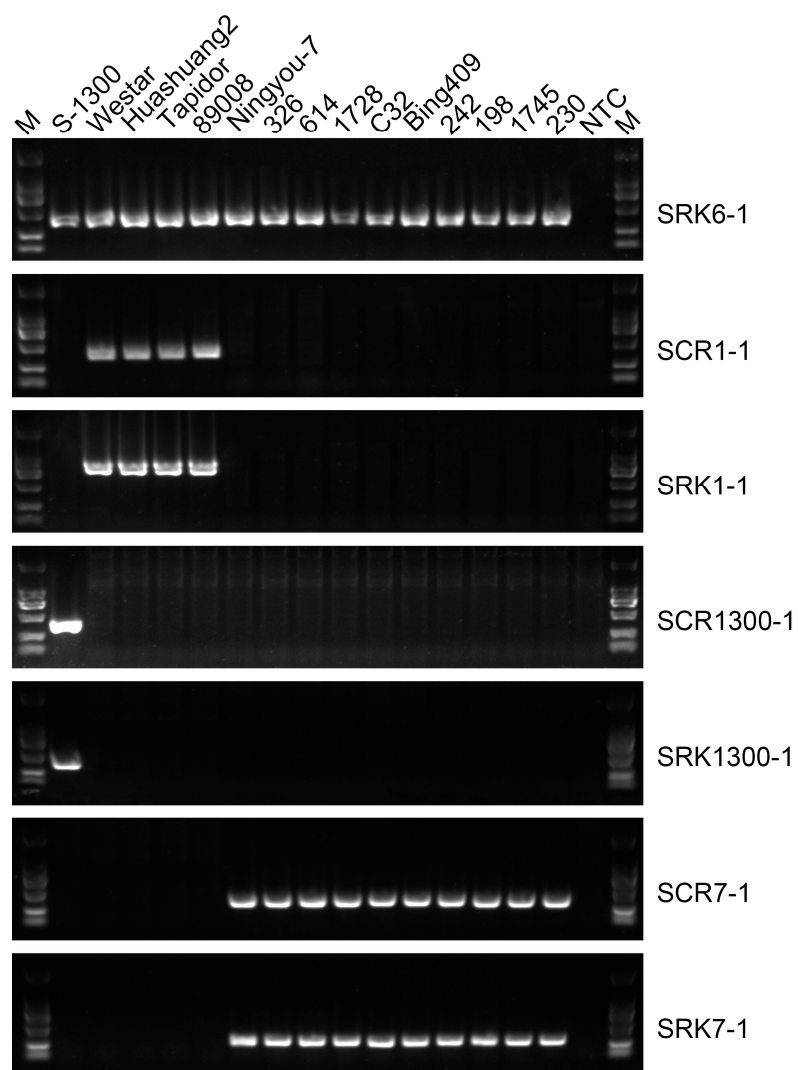

**Figure S2.** PCR fragments amplified from 'S-1300' and 14 *B. napus* SC lines using SCAR markers. NTC: no template control. M: DNA marker, from top to bottom, the size of band was 2,000, 1,000, 750, 500, 300, and 200 bp, respectively.

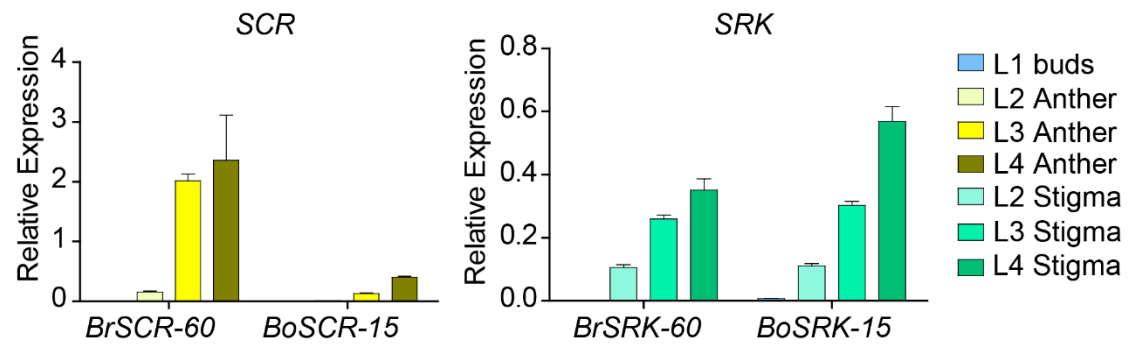

**Figure S3.** Expression analysis of *SCR* and *SRK* in the flower tissues of *B. rapa* and *B. oleracea*. The picture on the left shows the expression of *SCR* in the flowers of *B. rapa* and *B. oleracea* respectively. *BrSCR-60* is expressing in the anthers of different developmental stages of *B. rapa* 'BrHB'. The right picture shows the expression of *SRK* in the stigma of *B. rapa* and *B. oleracea* respectively. *BrSRK-60* is expressing in the stigma of different development stages of *B. rapa* 'BrHB'. *BoSRK-15* is expressing in the stigma of different developmental stages of *B. oleracea* 'BoRBR'.

### BnSCR-6 Promoter

```

+ CCAACCA CAA CACTAACTT CACATTAAAA ACTATA TTAT AATATTATA TATTATATAT TTATGTTTTT
- GGTGGTGTT GTGATTGAA GTGTAATTTT TGATATAATA TTATAATATT ATAATATATA AATACAAAAA

+ ATTTATTATT GATTTAATTG CTTATTTTAA TAATAAAATA AATGAATAGT TTTTAGTGAT ATGTATAGTA
- TAAATAATAA CTAAATTAAC GAATAAAATTT ATTATTTTAT TTACTTATCA AAAATCACTA TACATATCAT

+ TTTTAGTG TG GTGAATAATA TCACACCAA TTTGGTGTTGA AACTATAATG TTGCATTAAA ATGGTATAAT
- AAAATCACAC CACTTATTAT AGTGTGGTTT AAACCACACT TTGATATTAC AACGTAATTT TACCATATTA

+ TTTTAGTGTT GGATTGAAGT ACGTTTTTGT GTCAAATTCA TACTAAAATA GAATTATTTA TTAGTTACAA
- AAAATCACAA CCTAACTTCA TGCAAAAACA CAGTTTAAGT ATGATTTTAT CTTAATAAAT AATCAATGTT

+ AAAAATAAAA TTATTTATTT TAGTGTGGGA TTGGAGATAG CCTAAGTGTA TTTCAAAGGA GAAGAGCTCC
- TTTTTATTTT AATAAATAAA ATCACAACCT AACCTCTATC GGATTCACAT AAAGTTTCCT CTTCTCGAGG

+ GCAGGAAAAG AAGAATAGGA TGAGGAAGGT ACACACACGA ATAAGGTGTG ACCCGAATTG TTTACGTGTA
- CGTCCTTTTC TTCCTTATCCT ACTCCTTCCA TGTGTGTGCT TATTCCACAC TGGGCTTAAC AATGTCAGAT

+ AAATAGGCAA TTATGTGCTA GATGCGAAGA AAAACATATA TATAGTAATA CAAACAATAA CATCTATATA
- TTTATCCGTT AATACACGAT CTACGCTTCT TTTTGTATAT ATATCATTAT GTTTGTTATT GTAAGATATT

+ AAAAGCGAAA ATCTTATATA CTCATAAG
- TTTTCGCTTT TAGAATATAT GAGTATTC

```

### BnSCR-1300 Promoter

```

+ GTTTTAGTAC TAAAAAATT GTTTTCAAC CATAACATTA AACTTTACAT TAAAAACAAT TTTATCATAT
- CAAAATCATG ATTTTTTTAA CAAAAAGTTG GTATTGTAAT TTGAAATGTA ATTTTGTGTA AAATAGTATA

+ TATATAGATT TATGTTTTAT TTATTATTGA TTTAGTTGTT TATTTTAATA ATAAAAATAA TGAATAGTTT
- ATATATCTAA ATACAAAATA AATAATACT AAATCAACAA ATAAAAATTAT TATTTTATTT ACTTATCAAA

+ TTTAGTGAAA TGAATAATAT TTTAGTGTGG TGAGTAGTAT TACACTAAAT TTGGTGTGAA ACTATAATGT
- AAATCACTTT ACTTATTATA AAATCACACC ACTCATCATA ATGTGATTTA AACCACACTT TGATATTACA

+ TACATTAAAA TGGAATAATC TTTATTGTTG GATTGGAAAA TATTGTTATG TCAAAATCAT ACTAAAATAG
- ATGTAATTTT ACCATATTAG AATAACAAC CTAACCTTTT ATAACAATAC AGTTTTAGTA TGATTTTATC

+ AATTGTTTAT TTTAGTGTG GATTGAAGAT GGCCTAAGTG TTTTTTAAAC CAGAAGAGCT CCGCAGGAAA
- TTAACAAATA AAATCACAC CTAACCTTCTA CCGGATTCAC AAAAAATTTG GTCTTCTCGA GCGTCCTTT

+ AGAAGAATTG GATGAGGAAG TTACACACAC GAATAAGGTG TGACCCGAAT TGTTTACGTG TAAAATAGGC
- TCTTCTTAAC CTACTCCTTC AATGTGTGTG CTTATTCCAC ACTGGGCTTA ACAAATGCAC ATTTTATCCG

+ AATTAAAGTGC AAGATGTGAA GGAAAAAATA TATATATATA TAGTAATACA AGCAATAACA TTCTATAAAA
- TTAATTCACG TTCTACACTT CCTTTTTTTT ATATATATAT ATCATTATGT TCGTTATTGT AAGATATTTT

+ AAGCGAAAAT CTATATACT CATAAGT
- TTCGCTTTTA GAATATATGA GTATTCA

```

|                                                                                              |                                                                                                 |                                                                                                 |                                                                                                |
|----------------------------------------------------------------------------------------------|-------------------------------------------------------------------------------------------------|-------------------------------------------------------------------------------------------------|------------------------------------------------------------------------------------------------|
| <span style="background-color: #00FFFF; border: 1px solid black; padding: 2px;">MYB</span>   | <span style="background-color: #CCCCFF; border: 1px solid black; padding: 2px;">TATA-box</span> | <span style="background-color: #FFCCCC; border: 1px solid black; padding: 2px;">CAAT-box</span> | <span style="background-color: #00FF00; border: 1px solid black; padding: 2px;">AT-rich</span> |
| <span style="background-color: #00FF00; border: 1px solid black; padding: 2px;">I-box</span> | <span style="background-color: #FF00FF; border: 1px solid black; padding: 2px;">G-box</span>    | <span style="background-color: #FF0000; border: 1px solid black; padding: 2px;">ARBE4</span>    |                                                                                                |

Figure S4. *cis*-elements prediction in the promoters of *BnSCR-6* and *BnSCR-1300*
