# Supplementary material for: Characterization of a Common S Haplotype BnS-6 in the Self-Incompatibility of Brassica napus
Source: Plants (Basel). 2021 Oct 15;10(10):2186. doi: 10.3390/plants10102186 (PMC8537745; doi:10.3390/plants10102186)
Supplement: Supplementary file 1 [file plants-10-02186-s001.zip › Supportment Table1.pdf]

**Table S1.** Primers used in this study

| Primer name | Sequence (5'-3')                       | Use                                                            |
|-------------|----------------------------------------|----------------------------------------------------------------|
| SRK6-1-F    | ATTCGATTGTGTTTCAGGCTC                  | SCAR marker                                                    |
| SRK6-1-R    | TCGACATGGTGATTTGGTTC                   |                                                                |
| SCR1-1-F    | TCTGAATCATGAAATCTGCTGT                 |                                                                |
| SCR1-1-R    | TTAAAAGGATTCTGCAAAGTTCT                |                                                                |
| SRK1-1-F    | CTTCTGATCATGTTTTGCCTCTG                |                                                                |
| SRK1-1-R    | CGAGATCTTTGGGACCATATTTTC               |                                                                |
| SCR1300-1-F | TGAAGATGGCCTAAGTGTTTTTTAAACC           |                                                                |
| SCR1300-1-R | GCTCCTGGAATTAATGCAC                    |                                                                |
| SRK1300-1-F | GTTCCGGTTCACCTACGTAAAAAC               |                                                                |
| SRK1300-1-R | CTGAGGAATAATAGGAGATACG                 |                                                                |
| SCR7-1-F    | GTAAACAATAACATTCTACAGAAAGCGACG         |                                                                |
| SCR7-1-R    | CAAAGGCAATTAGTAACATTCGGTCCGA           |                                                                |
| SRK7-1-F    | AGTGGGATCTGCAAACAGTTG                  |                                                                |
| SRK7-1-R    | GGGCTAATGTATCATATATATGACTTGACC         |                                                                |
| SRK7-F      | CGGTTTAGAATCATCCATAG                   | qRT-PCR for <i>SCR</i><br>and <i>SRK</i> in <i>B. napus</i>    |
| SRK7-R      | CATCGTCACGCCTAGAAT                     |                                                                |
| SRK6-F      | GAATGGCAAGGATCTTTGGACGG                |                                                                |
| SRK6-R      | TAGACCTTGACCTTCTTTCCAATTC              |                                                                |
| SRK1300-F   | GAATGGCAAGGATCTTTGGACAA                |                                                                |
| SRK1300-R   | TAGACCTTGACCTTCTTTCCAATTT              |                                                                |
| SRK1-F      | GAAGACAATCTTCTAAGCTGTGC                |                                                                |
| SRK1-R      | CACACAAGAGACCAATTTGTATGC               |                                                                |
| SCR7-F      | CTGAAGGCATCGCCAAATCG                   |                                                                |
| SCR7-R      | ATCGTATCTGGATGTTTCGTTG                 |                                                                |
| SCR6-F      | ATATACATTTTAAACAAATATACACTACTTG        |                                                                |
| SCR6-R      | TGTGCTCCTGGAATTAAAGCGT                 |                                                                |
| SCR1300-F   | CTTCTATATATACATTTTAAACAAATATACACTACTTA |                                                                |
| SCR1300-R   | AACTCTGTGCTCCTGGAATTAATGCTC            | Amplification of<br><i>BnSCR-6</i> genomic<br>sequence and 5'- |
| SCR1-F      | CATCGTTTCAGGTCATATTCAAGAAG             |                                                                |
| SCR1-R      | AGAATTTGTGCATTCGCAACG                  |                                                                |
| Actin7-F    | CTATCCTCCGTCTCGATCTCGC                 |                                                                |
| Actin7-R    | CTTAGCCGTCTCCAGCTCTTG                  |                                                                |
| SCR-6-R     | TACTGGGTCTTATTAATTAGTCTTTGAGT          | Amplification of<br><i>BnSCR-6</i> genomic<br>sequence and 5'- |
| SCR-6P1-F   | CTAACTATTTCCTTTTAAAGCACG               |                                                                |
| SCR-6P2-F   | TTCCAACCACAACACTAACTTCAC               |                                                                |

|              |                                      |                                                            |
|--------------|--------------------------------------|------------------------------------------------------------|
| SCR-6P3-F    | GTGATATGTATAGTATTTTAGTGTG            | deletion promoter<br>constructs of<br><i>BnSCR-6</i>       |
| SCR-6P4-F    | TGTTGGATTGAAGTACGTTTTTG              |                                                            |
| SCR-6ProR    | GACTTATGAGTATATAAGATTTTCGC           |                                                            |
| SCR-1300P1-F | ACGAATAAGGTTTATCCGAATGTTT            | 5'-deletion promoter<br>constructs of<br><i>BnSCR-1300</i> |
| SCR-1300P2-F | CAAAAACATCTCCAATACATAACAG            |                                                            |
| SCR-1300P3-F | TAATAAAATAAATGAATAGTTTTTTAGT         |                                                            |
| SCR-1300P4-F | TTATTGTTGGATTGGAAAATATTGTTA          |                                                            |
| SCR1300-ProR | GACTTATGAGTATATAAGATTTTCGC           |                                                            |
| 47-684proF   | CGAGCTCGACACACCATCACCATTCTTT         | <i>BnSCR-6</i><br>overexpression                           |
| 47-1860proF  | CGAGCTCAGCTTCACTCTGGACTGTC           |                                                            |
| 47-proR      | ACGCGTCGACGATTCAGAAAAGTGATAAAAGATTC  |                                                            |
| SCR6CDS-F    | ACGCGTCGACATGAGATATGCTACTTCTATATATAC |                                                            |
| SCR6CDS-R    | GGGTAACCTTATGATTAACTTTGCAACA         |                                                            |

F, forward primer; R, reverse primer.
