# Supplementary material for: Characterization of a Common S Haplotype BnS-6 in the Self-Incompatibility of Brassica napus
Source: Plants (Basel). 2021 Oct 15;10(10):2186. doi: 10.3390/plants10102186 (PMC8537745; doi:10.3390/plants10102186)
Supplement: Supplementary file 1 [file plants-10-02186-s001.zip › Supportment Table2 .xlsx]

## Sheet: Table S2
Table S2. The result of PCR amplification with SCAR markers in the B. napuscultivals and inbred lines
Code	Inbred lines/Cultivars	SCAR marker
		SRK6-1	SRK1-1	SRK7-1	SCR7-1	SRK1300-1
1	SWU20	+	－	+	+	－
2	SWU23	+	+	－	－	－
3	SWU26	+	+	－	－	－
4	SWU27	+	－	+	+	－
5	SWU28	+	－	+	+	－
6	SWU29	+	－	－	－	－
7	SWU30	+	－	+	+	－
8	SWU31	+	－	+	+	－
9	SWU32	+	+	－	－	－
10	SWU34	+	－	+	+	－
11	SWU38	+	－	+	+	－
12	SWU40	+	－	+	+	－
13	SWU42	+	+	－	－	－
14	SWU43	+	－	+	+	－
15	SWU44	+	－	+	+	－
16	SWU45	+	－	+	+	－
17	SWU46	+	+	－	－	－
18	SWU47	+	+	－	－	－
19	SWU48	+	－	+	+	－
20	SWU52	+	－	+	+	－
21	SWU53	+	+	－	－	－
22	SWU56	+	－	+	+	－
23	SWU59	+	+	－	－	－
24	SWU65	+	－	+	+	－
25	SWU82	+	－	+	+	－
26	SWU83	+	－	+	+	－
27	SWU92	+	－	+	+	－
28	SWU101	+	－	+	+	－
29	SWU106	+	+	－	－	－
30	SWU108	+	－	+	+	－
31	Chuanyou20	+	－	+	+	－
32	Chuanyou18	+	－	+	+	－
33	CY12NY-7	+	－	+	+	－
34	CY12Q95406	+	+	－	－	－
35	CY12Q8-7	+	+	－	－	－
36	CY12QSZ06	+	+	－	－	－
37	CY12QCWH-1	+	－	+	+	－
38	CY12Q95108	+	+	－	－	－
39	CY12Q21535-N3	+	+	－	－	－
40	CY12PXW-4	+	－	+	+	－
41	CY12PXW-6	+	－	+	+	－
42	CY12PXW-9	+	+	－	－	－
43	CY13PXW-17	+	－	+	+	－
44	CY14PXW-18	+	+	－	－	－
45	CY15PXW-31	+	+	－	－	－
46	CY16PXW-35	+	－	－	－	－
47	CY17PXW-58	+	+	－	－	－
48	CY18PXW-62	+	－	－	－	－
49	CY19PXW-65	+	+	－	－	－
50	CY20PXW-66	+	－	+	+	－
51	CY21PXW-84	+	+	－	－	－
52	CY12GJ-1	+	+	－	－	－
53	wx1025	+	+	－	－	－
54	wx10213	+	－	－	－	－
55	wx10296	+	－	+	+	－
56	wx10315	+	+	－	－	－
57	10-1043	+	+	+	+	－
58	10-1047	+	－	+	+	－
59	10-1061	+	+	－	－	－
60	10-1070	+	+	－	－	－
61	10-804	+	+	－	－	－
62	10-1358	+	+	－	－	－
63	1472	+	+	－	－	－
64	Xiangyou13	+	+	－	－	－
65	Xiangyou15	+	+	－	－	－
66	Xiangyou11	+	+	－	－	－
67	740	+	－	+	+	－
68	631	+	+	－	－	－
69	613	+	+	－	－	－
70	783	+	－	+	+	－
71	782	+	+	－	－	－
72	YB3	+	－	+	+	－
73	1360	+	+	－	－	－
74	563	+	+	－	－	－
75	WX10329	+	+	－	－	－
76	Santana	+	+	－	－	－
77	1281	+	+	－	－	－
78	509	+	－	+	+	－
79	1368	+	+	－	－	－
80	1322	+	+	－	－	－
81	1252	+	－	+	+	－
82	1321	+	+	－	－	－
83	07022	+	－	+	+	－
84	07094	+	－	－	－	－
85	07016	+	－	+	+	－
86	9F087	+	－	－	－	－
87	97096	+	+	－	－	－
88	97097	+	+	－	－	－
89	07189	+	－	+	+	－
90	07191	+	－	+	+	－
91	07037	+	+	－	－	－
92	RQ011	+	－	+	+	－
93	RR009	+	－	+	+	－
94	RR002	+	－	+	+	－
95	97177	+	+	－	－	－
96	96021	+	+	－	－	－
97	96063	+	－	+	+	－
98	01111	+	+	－	－	－
99	01570	+	+	+	+	－
100	9bao22	+	+	－	－	－
101	01188	+	+	－	－	－
102	02354	+	－	－	－	－
103	02359	+	－	+	+	－
104	02365	+	+	－	－	－
105	93205	+	+	－	－	－
106	93210	+	+	－	－	－
107	Nca	+	－	+	+	－
108	Zhongshuang4	+	－	+	+	－
109	Zhongshuang9	+	－	+	+	－
110	Zhongshuang11	+	－	+	+	－
111	2011-6200	+	－	+	+	－
112	2011-6308	+	+	－	－	－
113	2011-7103	+	+	－	－	－
114	2012-11526	+	－	+	+	－
115	2012-3448	+	+	－	－	－
116	2012-3546	+	－	+	+	－
117	2012-4531	+	+	－	－	－
118	2012-5086	+	－	+	+	－
119	2012-5113	+	－	+	+	－
120	2012-8327	+	－	+	+	－
121	2012-8355	+	+	－	－	－
122	2012-8380	+	+	－	－	－
123	2012-8998	+	+	－	－	－
124	2012-9323	+	－	+	+	－
125	2012-9354	+	－	+	+	－
126	2012-9380	+	－	+	+	－
127	2012-9478	+	+	－	－	－
128	2012-9542	+	+	－	－	－
129	2012-K8053	+	+	－	－	－
130	R2	+	+	－	－	－
131	Xiwang106	+	－	+	+	－
132	Yangguang198	+	－	+	+	－
133	Yangguang2009	+	－	+	+	－
134	Zhongshuang10	+	－	+	+	－
135	Zhongshuang12	+	－	+	+	－
136	Zhongshuang4Q	+	－	+	+	－
137	Zhongshuang6	+	+	－	－	－
138	Zhongshuang7	+	－	+	+	－
139	Zhongyou589	+	－	+	+	－
140	Zhongyou821Q	+	－	+	+	－
141	Huayou2	+	－	+	+	－
142	Major	+	－	+	+	－
143	Huangshuang2	+	+	－	－	－
144	Aurora	+	－	+	+	－
145	Huayou13	+	+	－	－	－
146	Rucabo	+	+	－	－	－
147	Huayou3	+	+	－	－	－
148	Huayou14	+	+	－	－	－
149	Ningyou1	+	－	+	+	－
150	Ceres	+	+	－	－	－
151	11-9-700	+	+	－	－	－
152	11-9-701	+	+	－	－	－
153	11-9-702	+	－	+	+	－
154	11-9-703	+	+	－	－	－
155	11-9-704	+	+	－	－	－
156	11-9-705	+	+	－	－	－
157	11-9-706	+	－	+	+	－
158	11-9-707	+	－	+	+	－
159	11-P63-5Y7	+	－	－	－	+
160	11-P63-8Y32	+	－	－	－	+
161	11-P63-3Y3	+	－	－	－	+
162	11-P67dong	+	+	－	－	－
163	09-P64-1	+	+	－	－	－
164	10-C23	+	+	－	－	－
165	10-C24	+	－	+	+	－
166	10-C25	+	+	－	－	－
167	10-C29	+	－	+	+	－
168	10-C32	+	－	+	+	－
169	10-C33	+	+	－	－	－
170	10-C34	+	－	+	+	－
171	10-JP2	+	+	－	－	－
172	10-JP3	+	－	+	+	－
173	11-Y7-103	+	－	+	+	－
174	11-Y7-117	+	－	+	+	－
175	11-Y7-125	+	－	+	+	－
176	11-P74-8	+	+	－	－	－
177	11-P74-13	+	－	+	+	－
178	7-7766-74TZ	+	+	－	－	－
179	P18	+	－	+	+	－
180	64P-10	+	－	+	+	－
181	Shengguang77	+	－	+	+	－
182	JY-17	+	+	－	－	－
183	JY-16	+	+	－	－	－
184	JY-20	+	－	+	+	－
185	JY-21	+	+	－	－	－
186	Huashuang5	+	－	+	+	－
187	Huashuang4	+	－	+	+	－
188	J-972	+	－	+	+	－
189	Huashuang128	+	－	+	+	－
190	J-904	+	－	+	+	－
191	J-908	+	－	+	+	－
192	JPF-190P	+	－	+	+	－
193	J-915	+	－	+	+	－
194	J-922	+	－	+	+	－
195	J-951	+	+	－	－	－
196	J-917	+	－	+	+	－
197	J-923	+	－	+	+	－
198	J-931	+	－	+	+	－
199	JY-05P	+	+	－	－	－
200	J-963P	+	+	－	－	－
201	Luyou17	+	+	－	－	－
202	Luyou15	+	－	+	+	－
203	Luyou12	+	－	+	+	－
204	Ningyou18	+	－	+	+	－
205	Ningyou16	+	－	－	－	－
206	Ningyou14	+	－	+	+	－
207	Ningyou12	+	+	－	－	－
208	Shilijia	+	－	+	+	－
209	Shilifeng	+	－	+	+	－
210	Yangyou6	+	－	+	+	－
211	Yangyou5	+	+	－	－	－
212	Zhenyou3	+	－	+	+	－
213	Hongyou3	+	－	+	+	－
214	Shuyou1	+	－	+	+	－
215	Zheyou18	+	+	－	－	－
216	Zheshuang72	+	－	+	+	－
217	Zheshuang8	+	－	+	+	－
218	Zheyou758	+	+	－	－	－
219	Luyou14	+	－	－	－	－
220	Luyou18	+	+	－	－	－
221	Luyou19	+	+	－	－	－
222	Zheyou19	+	－	+	+	－
223	Zheyou21	+	+	－	－	－
224	Zheshuang6	+	－	+	+	－
225	Wanyou15	+	－	+	+	－
226	Wanyou16	+	－	+	+	－
227	Wanyou20	+	+	－	－	－
228	Wanyou29	+	+	－	－	－
229	AGREV012	+	+	－	－	－
230	AGREV019	+	+	－	－	－
231	AGREV021	+	+	－	－	－
232	Topas	+	－	－	－	－
233	Cyclon	+	+	－	－	－
234	Weijie	+	－	－	－	－
235	Sida	+	－	－	－	－
236	Zhizun	+	－	－	－	－
237	Haishen	+	+	－	－	－
238	D2	+	－	+	+	－
239	D3	+	+	－	－	－
240	Qu	+	－	－	－	－
241	11-985	+	－	－	－	－
242	11-504	+	－	+	+	－
243	11-997	+	+	－	－	－
244	11-540	+	+	－	－	－
245	11-1184	+	+	－	－	－
246	10-758	+	－	+	+	－
247	10-1230	+	－	－	－	－
248	10-847	+	－	－	－	－
249	11-1124	+	－	+	+	－
250	Shan2A	+	+	－	－	－
251	Sha2B	+	－	+	+	－
252	KenC1	+	－	+	+	－
253	P113	+	－	+	+	－
254	P158	+	+	－	－	－
255	P310	+	－	－	－	－
256	P312	+	－	+	+	－
257	P668	+	－	－	－	－
258	P685	+	+	－	－	－
259	A117	+	－	+	+	－
260	A172	+	－	+	+	－
261	B250	+	+	－	－	－
262	B265	+	－	+	+	－
263	A109	+	+	－	－	－
264	B285	+	－	+	+	－
265	C052	+	－	+	+	－
266	GY270	+	－	+	+	－
267	GY282	+	－	+	+	－
268	GY284	+	+	－	－	－
269	B262	+	+	－	－	－
270	A82	+	－	+	+	－
271	A98	+	－	+	+	－
272	B414	+	－	+	+	－
273	B308	+	－	+	+	－
274	A97	+	－	+	+	－
275	A148	+	－	+	+	－
276	B431	+	+	－	－	－
277	08-P35	+	+	－	－	－
278	08-P36	+	+	－	－	－
279	09-P32	+	－	+	+	－
280	09-P36	+	+	－	－	－
281	09-P37	+	+	－	－	－
282	10-P10	+	－	+	+	－
283	10-P29	+	+	－	－	－
284	11-P30	+	－	+	+	－
285	12-P24	+	+	+	+	－
286	12-P25	+	+	－	－	－
287	03II13	+	+	－	－	－
288	03II3B	+	+	－	－	－
289	03I32B	+	+	－	－	－
290	964	+	+	－	－	－
291	DD1	+	+	－	－	－
292	gl302-1	+	+	+	+	－
293	06T9F	+	－	+	+	－
294	LY2	+	+	－	－	－
295	03II4B	+	+	－	－	－
296	03LF1	+	+	－	－	－
297	9852	+	+	－	－	－
298	9801C	+	－	+	+	－
299	986	+	－	+	+	－
300	876	+	－	－	－	－
301	Wu164	+	+	－	－	－
302	LY4	+	－	－	－	－
303	9889	+	+	－	－	－
304	06H7	+	+	－	－	－
305	TY4	+	+	－	－	－
306	Hubeibai white rape	+	－	－	－	－
307	Nanchuan siliqua	+	+	－	－	－
308	IMC103	+	+	－	－	－
309	Oscar	+	+	－	－	－
310	Sophia	+	－	+	+	－
311	Campina	+	－	－	－	－
312	Conny	+	－	－	－	－
313	Wesreo	+	+	－	－	－
314	Wase Chousen	+	+	－	－	－
315	Gogatsuna	+	+	－	－	－
316	Nakaee Chousen	+	+	－	－	－
317	Cat.No.117	+	+	－	－	－
318	90750	+	－	－	－	－
319	Nonglin43	+	－	－	－	－
320	Tibet rapeseed	+	－	－	－	－
321	Youyan2	+	+	－	－	－
322	Aijiazao	+	－	+	+	－
323	Xinan-1	+	－	+	+	－
324	Xinan-2	+	－	+	+	－
325	Xinan-3	+	+	－	－	－
326	Xinan-4	+	+	－	－	－
327	Xinan-5	+	+	－	－	－
328	Xinan-6	+	+	－	－	－
329	Xinan-7	+	－	+	+	－
330	Xinan-8	+	+	－	－	－
331	Xinan-9	+	+	－	－	－
332	Xinan-10	+	－	+	+	－
333	Xinan-11	+	+	－	－	－
334	Xinan-12	+	+	－	－	－
335	Xinan-13	+	+	－	－	－
336	Xinan-14	+	－	+	+	－
337	Xinan-15	+	+	－	－	－
338	Xinan-16	+	+	－	－	－
339	Xinan-17	+	+	－	－	－
340	Xinan-18	+	－	+	+	－
341	Xinan-19	+	－	+	+	－
342	Xinan-20	+	－	+	+	－
343	Xinan-21	+	－	+	+	－
344	Xinan-22	+	－	+	+	－
345	Xinan-23	+	－	+	+	－
346	Xinan-24	+	－	+	+	－
347	Xinan-25	+	－	+	+	－
348	Xinan-26	+	－	+	+	－
349	Xinan-27	+	－	+	+	－
350	Xinan-28	+	－	+	+	－
351	Xinan-29	+	+	－	－	－
352	Xinan-30	+	－	+	+	－
353	Xinan-31	+	－	+	+	－
354	Xinan-32	+	－	－	－	－
355	Xinan-33	+	+	－	－	－
356	Xinan-34	+	－	+	+	－
357	Xinan-35	+	－	+	+	－
358	Xinan-36	+	+	－	－	－
359	Xinan-37	+	+	－	－	－
360	Xinan-38	+	－	－	－	－
361	Xinan-39	+	－	+	+	－
362	Xinan-40	+	－	+	+	－
363	Xinan-41	+	－	+	+	－
364	Xinan-42	+	+	－	－	－
365	Xinan-43	+	+	－	－	－
366	Zhongshuang10-2	+	+	－	－	－
367	Zhongshuang6-2	+	+	－	－	－
368	Zhongshuang7-2	+	+	－	－	－
369	Zhngshuang12	+	+	－	－	－
370	Zhongyou589-2	+	+	－	－	－
371	Fuyou4	+	－	+	+	－
372	Zhen3736	+	－	+	+	－
373	Zhen2609	+	+	－	－	－
374	HX0352	+	+	－	－	－
375	Yangguang2009-2	+	+	－	－	－
376	Luyou21	+	+	－	－	－
377	Zheshuang3	+	－	+	+	－
378	Zheyou21-2	+	－	+	+	－
379	Wanyou20-2	+	－	+	+	－
380	Wanyou12	+	－	+	+	－
381	Wanyou7	+	－	+	+	－
382	Hongyou3-2	+	+	－	－	－
383	Zhenyou5	+	+	－	－	－
384	Yangyou4	+	+	－	－	－
385	Luyou15-2	+	+	－	－	－
386	Luyou16	+	+	－	－	－
387	Luyou17-2	+	+	－	－	－
388	Luyou18-2	+	+	－	－	－
389	Zheshuang72-2	+	+	－	－	－
390	Zheshuang8-2	+	+	－	－	－
391	Zheyou50	+	－	+	+	－
392	Shuyou1-2	+	－	+	+	－
393	Zhongshuang4-2	+	+	－	－	－
394	Zhongshuang11-2	+	－	+	+	－
395	Yangguang198-2	+	－	+	+	－
396	Huahang901	+	－	－	－	－
397	YangJ6711	+	+	－	－	－
398	Yan6055	+	－	+	+	－
399	Yangjia8	+	+	－	－	－
400	Xiwang106-2	+	+	－	－	－
401	Zheyou17	+	+	+	+	－
402	Zhongshuang5	+	－	+	+	－
403	Zhongyou821	+	+	+	+	－
404	Qinyou1	+	+	－	－	－
405	Weilong88	+	+	+	+	－
406	Yanyou2	+	+	+	+	－
407	Qinyou5	+	+	+	+	－
408	Shuyou4	+	+	+	+	－
409	Fengyou9	+	+	－	－	－
410	De68—12	+	－	+	+	－
411	Monty	+	+	－	－	－
412	Oscar-2	+	+	－	－	－
413	Ningyou12-2	+	+	－	－	－
414	Ningyou14-2	+	－	－	－	－
415	Shilifeng-2	+	－	+	+	－
416	Ningyou18-2	+	+	+	+	－
417	Ningyou10	+	+	－	－	－
418	Helios	+	+	－	－	－
419	Hector	+	+	+	+	－
420	Mian96-203-09	+	－	+	+	－
421	Qing662A	+	+	+	+	－
422	699	+	+	－	－	－
423	Canada 2	+	+	－	－	－
424	Zhongshuang2	+	－	+	+	－
425	Zhongshuang9-2	+	－	+	+	－
426	WH-12	+	－	+	+	－
427	WH-15	+	－	+	+	－
428	WH-17	+	+	+	+	－
429	WH-19	+	－	+	+	－
430	WH-20	+	－	+	+	－
431	WH-23	+	－	+	+	－
432	WH-24	+	+	－	－	－
433	WH-25	+	+	－	－	－
434	WH-26	+	+	－	－	－
435	WH-27	+	+	－	－	－
436	WH-28	+	－	+	+	－
437	WH-29	+	－	+	+	－
438	WH-30	+	+	－	－	－
439	WH-31	+	+	－	－	－
440	WH-33	+	+	－	－	－
441	WH-37	+	+	－	－	－
442	WH-38	+	－	+	+	－
443	WH-41	+	+	－	－	－
444	WH-42	+	+	－	－	－
445	WH-43	+	+	－	－	－
446	WH-45	+	+	－	－	－
447	WH-49	+	－	+	+	－
448	WH-50	+	+	－	－	－
449	WH-55	+	+	－	－	－
450	WH-56	+	+	－	－	－
451	WH-57	+	+	－	－	－
452	WH-58	+	+	－	－	－
453	WH-59	+	+	－	－	－
454	WH-60	+	+	－	－	－
455	WH-61	+	+	－	－	－
456	WH-62	+	－	+	+	－
457	WH-63	+	+	－	－	－
458	WH-81	+	－	+	+	－
459	WH-83	+	－	+	+	－
460	WH-85	+	－	+	+	－
461	WH-88	+	－	+	+	－
462	WH-93	+	－	+	+	－
463	WH-95	+	+	－	－	－
464	WH-100	+	+	－	－	－
465	WH-127	+	+	－	－	－
466	Yuyou1	+	+	－	－	－
467	COBRA	+	－	+	+	－
468	NY7	+	－	+	+	－
469	Tapidor	+	－	+	+	－
470	Huayou6	+	+	－	－	－
471	Huayou12	+	+	－	－	－
472	Cubs root	+	+	－	－	－
473	Huayou10	+	－	+	+	－
474	Bienvenu	+	+	－	－	－
475	Shengli rape	+	+	－	－	－
476	Erake	+	+	－	－	－
477	Taisetsu	+	+	－	－	－
478	Cresor	+	+	－	－	－
479	Daichousen	+	－	+	+	－
480	Comet	+	+	－	－	－
481	Niklas	+	－	+	+	－
482	Askari	+	+	+	+	－
483	Chuosenshu	+	+	－	－	－
484	Wesbrook	+	+	－	－	－
485	Suigenshu	+	+	－	－	－
486	Huayou4	+	+	－	－	－
487	Shengliqinggan	+	+	－	－	－
488	Mijiaduotou rape	+	－	－	－	－
489	Aiqishengli	+	－	+	+	－
490	Caojingshengli	+	+	+	+	－
491	Luyou3	+	+	－	－	－
492	Shayeqing	+	－	+	+	－
493	Y7	+	－	+	+	－
494	Lujizao	+	+	－	－	－
495	Caoyou2	+	+	－	－	－
496	Luyou16-2	+	+	－	－	－
497	Fengding240	+	－	+	+	－
498	Quanzi rape	+	－	+	+	－
499	Dahuaqiu	+	+	+	+	－
500	Rongxuan	+	－	+	+	－
501	Ningyou10-2	+	－	+	+	－
502	Ningyou8	+	－	+	+	－
503	Ningyou6	+	－	+	+	－
504	Duoyou1	+	－	+	+	－
505	Huaiyou6	+	－	+	+	－
506	Huaiyou12	+	－	－	－	－
507	Peixuan170	+	+	－	－	－
508	Guangde138	+	－	+	+	－
509	Guangde8104	+	+	+	+	－
510	Dangyouzao1	+	－	+	+	－
511	Gaungde761	+	－	+	+	－
512	Tonglinghuaye	+	－	+	+	－
513	Chu610	+	－	－	－	－
514	Chu107	+	－	+	+	－
515	Shu84-6	+	－	－	－	－
516	Wanyouzao	+	－	+	+	－
517	Chuyou1	+	+	－	－	－
518	Chuxianbaihua	+	+	+	+	－
519	Jie65-1	+	+	+	+	－
520	Shenhuang1	+	－	+	+	－
521	Zheyou601	+	－	+	+	－
522	Sangao rape	+	－	+	+	－
523	Zaofeng1	+	－	+	+	－
＋: Successful amplification; －: No amplification.
