# Supplementary material for: Characterization of a Common S Haplotype BnS-6 in the Self-Incompatibility of Brassica napus
Source: Plants (Basel). 2021 Oct 15;10(10):2186. doi: 10.3390/plants10102186 (PMC8537745; doi:10.3390/plants10102186)
Supplement: Supplementary file 1 [file plants-10-02186-s001.zip › Supportment Table3 .xlsx]

## Sheet: Sheet1
Table S3 Pollination test results of T2 generation transgenic plant with B. oleracea
MALE	FEMALE
	ZG11	ZG12	ZG22	ZG96	G1	G14	G49	G64	G68	G104	G118
SELF	-	-	-	-	+	+	+	+	+	+	+
W-SCR6-1	+	+	+	+	+	+	+	+	+	+	+
W-SCR6-2	+	+	+	+	+	+	+	+	+	+	+
W-SCR6-3	+	+	+	+	+	+	+	+	+	+	+
W-SCR6-4	+	+	+	+	+	+	+	+	+	+	+
W-SCR6-5	+	-	+	+	+	+	+	+	+	+	+
ZG11, ZG12, ZG22, ZG96, G1, G14, G49, G64, G68, G104 and G118 are different B. oleracea lines with BoS-15, among which, ZG11, ZG12, ZG22, ZG96 are male sterile.W-SCR6-1～5 are BnSCR-6 overexpressed T2 progeny plants. “SELF” stands for selfing, "-" means no pollination test, and "+" means that the pollen tube is normally elongated.
